# Supplementary material for: Mechanistic studies of La3+ and Zn2+-catalyzed methanolysis of O-ethyl O-aryl methylphosphonate esters. An effective solvolytic method for the catalytic destruction of phosphonate CW simulants
Source: Royal Society of Chemistry journal article supplement (doi:10.1039/b511550g), 2005-01-01
Supplement: b511550g.pdf [file b511550g.pdf]

Supporting Information for:

Mechanistic Studies of  $\text{La}^{3+}$  and  $\text{Zn}^{2+}$ -Catalyzed Methanolysis of *O*-Ethyl *O*-aryl methylphosphonate esters. Development of Effective Methods for the  
Catalytic Destruction of Phosphonate CW Simulants.

Roxanne E. Lewis, Alexei A. Neverov and R. Stan Brown \*

Department of Chemistry

Queen's University

Kingston, Ontario

Canada, K7L 3N6

Physical data for characterization of *O*-ethyl *O*-aryl methylphosphonates **6a-f**

***O*-Ethyl *O*-*p*-Chloro-*o*-nitrophenyl Methylphosphonate 6a**

$^1\text{H}$ -NMR (ppm, 400 MHz,  $\text{d}_3$ -acetonitrile):  $\delta$  8.02 (s, 1H), 7.70 (d,  $J = 8.0$  Hz, 1H), 7.54 (d,  $J = 8.0$  Hz, 1H), 4.18 (m,  $J = 8.0$  Hz, 2 Hz), 1.70 (d,  $J = 16$  Hz, 3H), 1.30 (t,  $J = 8.0$  Hz, 3H)

$^{31}\text{P}\{^1\text{H}\}$ -NMR (ppm, 400 MHz,  $\text{d}_3$ -acetonitrile):  $\delta$  29.95

MS (TOF MS):  $m/z$  301.99577 (M+Na)

Anal. Calc. for  $\text{C}_9\text{H}_{11}\text{NO}_5\text{NaP}$ :  $m/z$  301.99610

***O*-Ethyl *O*-*p*-Nitrophenyl Methylphosphonate 6b**

$^1\text{H}$ -NMR (ppm, 400 MHz,  $\text{d}_3$ -acetonitrile):  $\delta$  8.26 (d,  $J = 8.0$  Hz, 2H), 7.43 (d,  $J = 8.0$  Hz, 2H), 4.20 (m,  $J = 6$  Hz, 2H), 1.685 (d,  $J = 20$ , 3H), 1.32 (t,  $J = 6$  Hz, 3H)

$^{31}\text{P}\{^1\text{H}\}$ -NMR (ppm, 400 MHz,  $\text{d}_3$ -acetonitrile):  $\delta$  28.54

MS (TOF MS):  $m/z$  268.03555 (M+Na)

Anal. Calc. for  $\text{C}_9\text{H}_{12}\text{NO}_5\text{NaP}$ :  $m/z$  268.03508

**O-Ethyl O-m-Nitrophenyl Methylphosphonate 6c**

<sup>1</sup>H-NMR (ppm, 400 MHz, d<sub>3</sub>-acetonitrile): δ 8.08 (m, 2H), 7.635 (m, 2H), 4.20 (m, J = 8.0 Hz, 2H), 1.675 (d, J = 20 Hz, 3H), 1.32 (t, J = 8.0 Hz, 3H)

<sup>31</sup>P{<sup>1</sup>H}-NMR (ppm, 400 MHz, d<sub>3</sub>-acetonitrile): δ 28.82

MS (TOF MS): m/z 268.03294 (M+Na)

Anal. Calc. for C<sub>9</sub>H<sub>12</sub>NO<sub>5</sub>NaP: m/z 268.03508

**O-Ethyl O-p-Chlorophenyl Methylphosphonate 6d**

<sup>1</sup>H-NMR (ppm, 400 MHz, d<sub>3</sub>-acetonitrile): δ 7.40 (d, J = 10 Hz, 2H), 7.215 (d, J = 10 Hz, 2H), 4.15 (m, J = 6.0 Hz, 2H), 1.61 (d, J = 16 Hz, 3H), 1.30 (t, J = 6.0 Hz, 3H)

<sup>31</sup>P{<sup>1</sup>H}-NMR (ppm, 400 MHz, d<sub>3</sub>-acetonitrile): δ 28.02

MS (TOF MS): m/z 257.01005 (M+Na)

Anal. Calc. for C<sub>9</sub>H<sub>12</sub>O<sub>3</sub>NaPCl: m/z 257.01103

**O-Ethyl O-Phenyl Methylphosphonate 6e**

<sup>1</sup>H-NMR (ppm, 400 MHz, d<sub>3</sub>-acetonitrile): δ 7.41 (t, J = 8.0 Hz, 2H), 7.23 (m, J = 8.0 Hz, 3H), 4.16 (m, J = 8.0 Hz, 2H), 1.60 (d, J = 16 Hz, 3H), 1.30 (t, J = 8.0 Hz, 3H)

<sup>31</sup>P{<sup>1</sup>H}-NMR (ppm, 400 MHz, d<sub>3</sub>-acetonitrile): δ 27.50

MS (TOF MS): m/z 201.06726 (M+H)

Anal. Calc for C<sub>9</sub>H<sub>14</sub>O<sub>3</sub>P: m/z 201.04211

**O-Ethyl O-p-Methoxyphenyl Methylphosphonate 6f**

<sup>1</sup>H-NMR (ppm, 400 MHz, d<sub>3</sub>-acetonitrile): δ 7.13 (d, J = 10 Hz, 2H), 6.925 (d, J = 10 Hz, 2H), 4.145 (m, J = 6.0 Hz, 2H), 1.57 (d, J = 8.0 Hz, 3H), 1.30 (t, J = 6.0 Hz, 3H)

<sup>31</sup>P{<sup>1</sup>H}-NMR (ppm, 400 MHz, d<sub>3</sub>-acetonitrile): δ 27.76

MS (TOF MS): m/z 231.07210 (M+H)

Anal. Calc. for C<sub>10</sub>H<sub>16</sub>O<sub>4</sub>P: m/z 231.07862
